# Supplementary material
Source: PubMed Central journal article supplement (PMC2824267)
Supplement: 0913045107_pnas.0913045107_SI.pdf [file 0913045107_pnas.0913045107_SI.pdf]

# Supporting Information

Gräwert et al. 10.1073/pnas.0913045107

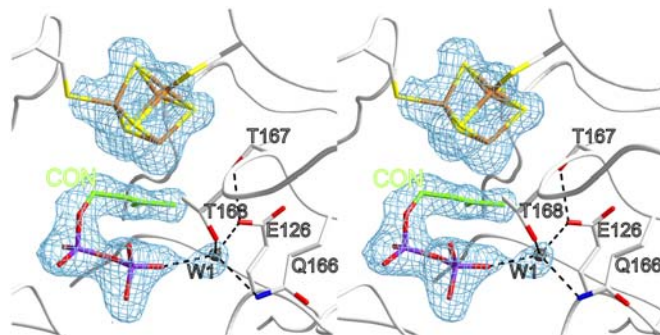

**Fig. S1.** Close-up stereoview of the active site of IspH with bound converted substrate interacting with the [4Fe-4S] cluster. The hydrogen bonding network at the IspH active site including protein, ligand and the W1 water molecule are indicated by dashed black lines. Electron densities represented in blue are contoured at  $1.0\sigma$  with  $2F_o - F_c$  coefficients; ligand has been omitted for the electron densities calculations.

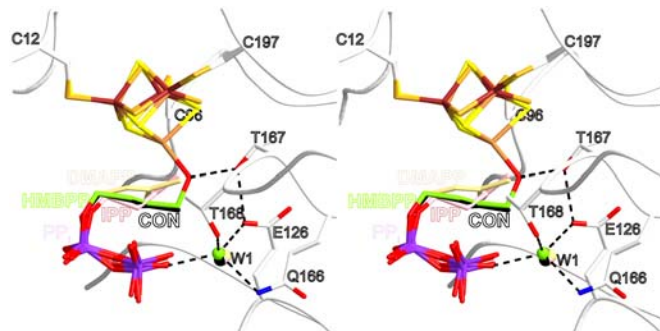

**Fig. S2.** Superposition of IspH active site with either covalently bound substrate, one of the products (IPP / DMAPP) or pyrophosphate. Notably, the pyrophosphate as well as water molecule W1 occupy the same position within the active site in all four structures. The conserved amino acids involved in the hydrogen-bonding network (*Dashed black lines*) show identical orientation in the respective structures.

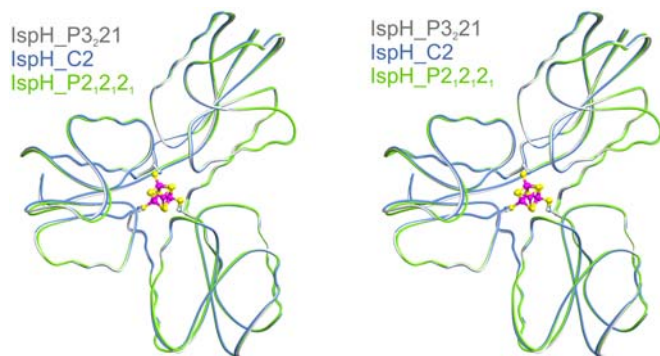

**Fig. S3.** Superposition of IspH protein crystallized in different space groups: Complex of IspH and pyrophosphate yielded space group  $P3_22_1$  when using 1.8 M potassium phosphate as crystallization buffer (reference 5 in the main text); complex of IspH and IPP yielded space group C2; IspH:DMAPP, IspH:HMBPP, IspH:CON(verted substrate) and IspH:PP, (BIS-Tris buffer, see methods section) complexes were crystallized in space group  $P2_22_1$ .

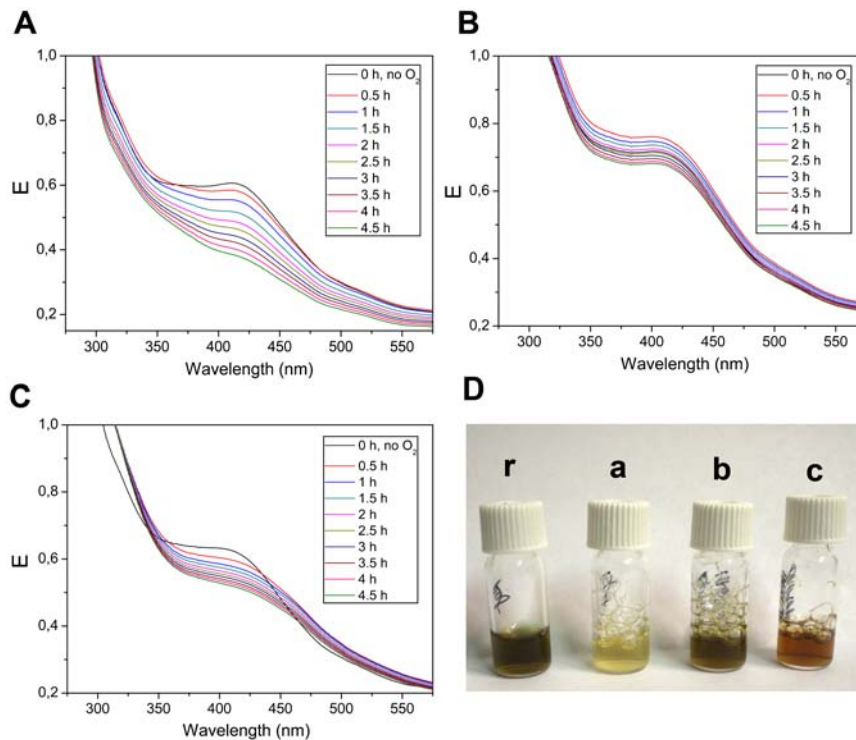

**Fig. 54.** UV-Vis spectra of IspH protein reveal influence of oxygen. (A) Wavelength scans of IspH show a shoulder at 410 nm typical for iron-sulfur clusters. After exposure to oxygen, the local maximum starts to vanish. (B) Wavelength scans of IspH with 50-mM substrate. The shoulder remains after exposure to oxygen. (C) Wavelength scans of IspH with 50 mM product (DMAPP). The shoulder vanishes after exposure to oxygen, but not as quickly as without any additive. (D) The effect of oxygen on IspH can be observed visually. All samples after incubation for 20 h at room temperature. r: IspH with no oxygen added. A: IspH with oxygen added. IspH lost its typical color. B: IspH in presence of 50 mM substrate with oxygen added. Protein retained its brown color. C: IspH in presence of 50 mM product (DMAPP) with oxygen added. IspH changed its color from brown to reddish.

**Table S1. Data collection and refinement statistics**

|                                                                  | IspH:HMBPP                                    | IspH:CON                                      | IspH:IPP          | IspH:DMAPP                                    | IspH:PP <sub>7</sub>                          |
|------------------------------------------------------------------|-----------------------------------------------|-----------------------------------------------|-------------------|-----------------------------------------------|-----------------------------------------------|
| <b>Crystal parameter</b>                                         |                                               |                                               |                   |                                               |                                               |
| Space group                                                      | P2 <sub>1</sub> 2 <sub>1</sub> 2 <sub>1</sub> | P2 <sub>1</sub> 2 <sub>1</sub> 2 <sub>1</sub> | C2                | P2 <sub>1</sub> 2 <sub>1</sub> 2 <sub>1</sub> | P2 <sub>1</sub> 2 <sub>1</sub> 2 <sub>1</sub> |
| <b>Cell dimensions</b>                                           |                                               |                                               |                   |                                               |                                               |
| <i>a</i> , <i>b</i> , <i>c</i> (Å)                               | 70.9; 80.7; 111.2                             | 69.6; 80.8; 112.7                             | 112.5; 80.6; 70.2 | 70.1; 80.4; 110.8                             | 71.2; 80.7; 111.4                             |
| $\alpha$ , $\beta$ , $\gamma$ (°)                                |                                               |                                               | $\beta=94.7$      |                                               |                                               |
| Molecules per AU <sup>a</sup>                                    | 2                                             | 2                                             | 2                 | 2                                             | 2                                             |
| <b>Data collection</b>                                           |                                               |                                               |                   |                                               |                                               |
| Beam line                                                        | SLS, PX06SA                                   | SLS, PX06SA                                   | CuK $_{\alpha}$   | SLS, PX06SA                                   | CuK $_{\alpha}$                               |
| Wavelength (Å)                                                   | 1.0                                           | 1.0                                           | 1.5418            | 1.0                                           | 1.5418                                        |
| Resolution range (Å) <sup>b</sup>                                | 10–1.7 (1.8–1.7)                              | 10–1.9 (2.0–1.9)                              | 65–2.0 (2.1–2.0)  | 65–1.7 (1.8–1.7)                              | 71–1.8 (1.9–1.8)                              |
| Unique reflections <sup>c</sup>                                  | 70059                                         | 50648                                         | 39891             | 68998                                         | 60002                                         |
| Completeness (%) <sup>b</sup>                                    | 99.6 (99.4)                                   | 99.9 (99.9)                                   | 100 (100)         | 99.3 (99.3)                                   | 100 (100)                                     |
| <i>R</i> <sub>merge</sub> (%) <sup>bd</sup>                      | 6.8 (29.4)                                    | 5.2 (40.9)                                    | 4.8 (24.3)        | 5.5 (27.7)                                    | 5.3 (28.2)                                    |
| <i>I</i> / $\sigma$ ( <i>I</i> ) <sup>b</sup>                    | 17.1 (5.8)                                    | 21.8 (5.4)                                    | 17.6 (4.0)        | 21.9 (6.6)                                    | 15.6 (3.4)                                    |
| <b>Refinement</b>                                                |                                               |                                               |                   |                                               |                                               |
| Resolution (Å)                                                   | 10–1.7                                        | 10–1.9                                        | 15–2.0            | 10–1.7                                        | 10–1.8                                        |
| <i>R</i> <sub>work</sub> / <i>R</i> <sub>free</sub> <sup>e</sup> | 0.241/0.269                                   | 0.214/0.248                                   | 0.226/0.272       | 0.216/0.237                                   | 0.234/0.278                                   |
| <b>Number atoms</b>                                              |                                               |                                               |                   |                                               |                                               |
| Protein                                                          | 4773                                          | 4773                                          | 4773              | 4773                                          | 4773                                          |
| Ligand                                                           | 30                                            | 28                                            | 28                | 28                                            | 18                                            |
| FeS-Cluster                                                      | 16                                            | 16                                            | 14                | 14                                            | 14                                            |
| Water                                                            | 603                                           | 484                                           | 456               | 460                                           | 631                                           |
| <i>B</i> factors                                                 | 22.9                                          | 35.8                                          | 20.1              | 22.1                                          | 15.1                                          |
| <b>rms deviations<sup>f</sup></b>                                |                                               |                                               |                   |                                               |                                               |
| Bond lengths (Å)                                                 | 0.007                                         | 0.007                                         | 0.006             | 0.005                                         | 0.006                                         |
| Bond angles (°)                                                  | 1.2                                           | 1.2                                           | 1.3               | 1.4                                           | 1.3                                           |
| Ramachandran (%) <sup>g</sup>                                    | 98.2/1.8/0.0                                  | 98.7/1.3/0.0                                  | 98.5/1.5/0.0      | 98.7/1.3/0.0                                  | 98.0/2.0/0.0                                  |
| PDB accession code                                               | 3KE8                                          | 3KE9                                          | 3KEM              | 3KEF                                          | 3KEL                                          |

<sup>a</sup>Asymmetric unit.

<sup>b</sup>Values in parenthesis of resolution range, completeness, *R*<sub>merge</sub> and *I*/ $\sigma$  (*I*) correspond to the last resolution shell.

<sup>c</sup>Friedel pairs were treated as identical reflections.

<sup>d</sup> $R_{\text{merge}}(I) = \frac{\sum \sum |I(hkl)_j - \langle I(hkl) \rangle|}{\sum I(hkl)_j hkl}$ , where  $I(hkl)_j$  is the *j*th measurement of the intensity of reflection *hkl* and  $\langle I(hkl) \rangle$  is the average intensity.

<sup>e</sup> $R = \frac{\sum |F_{\text{obs}}| - |F_{\text{calc}}|}{\sum |F_{\text{obs}}| hkl hkl}$ , where *R*<sub>free</sub> is calculated without a sigma cutoff for a randomly chosen 5% of reflections, which were not used for structure refinement, and *R*<sub>work</sub> is calculated for the remaining reflections.

<sup>f</sup>Deviations from ideal bond lengths/angles.

<sup>g</sup>Number of residues in favored region/allowed region/outlier region
